# Supplementary material for: Trend Analysis of Selected Hydroclimatic Variables for the Hornad Catchment (Slovakia)
Source: MDPI journal article supplement (doi:10.3390/w15030471), 2023-01-25
Supplement: s1 [file s1]

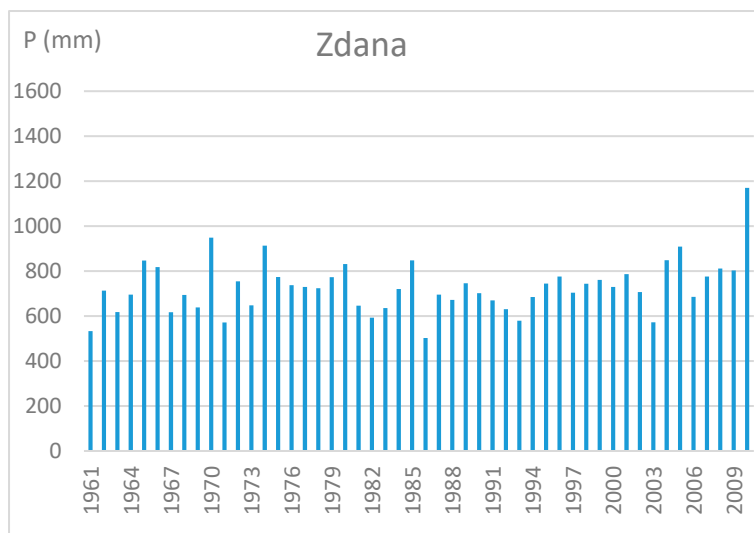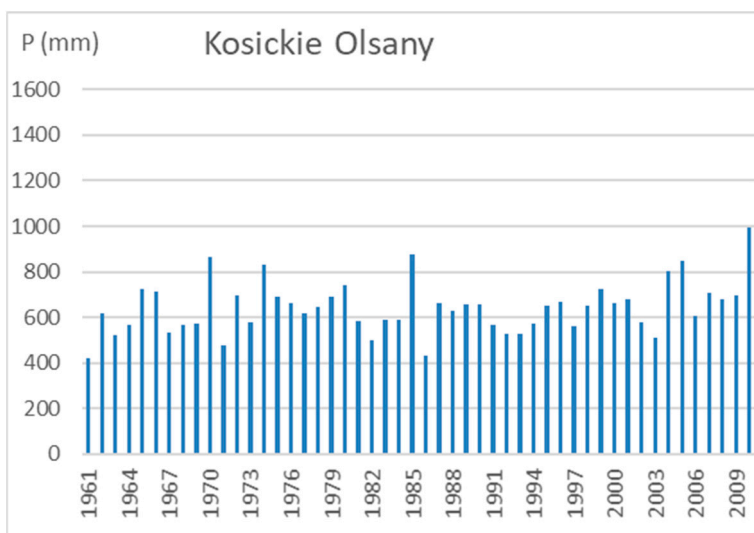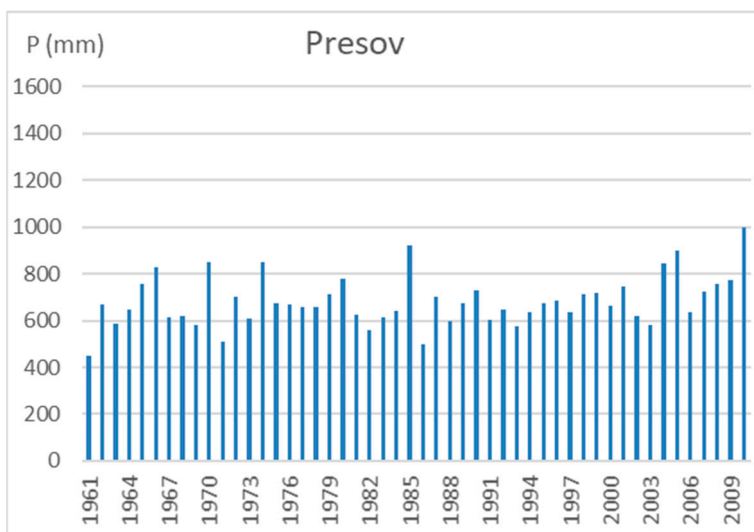

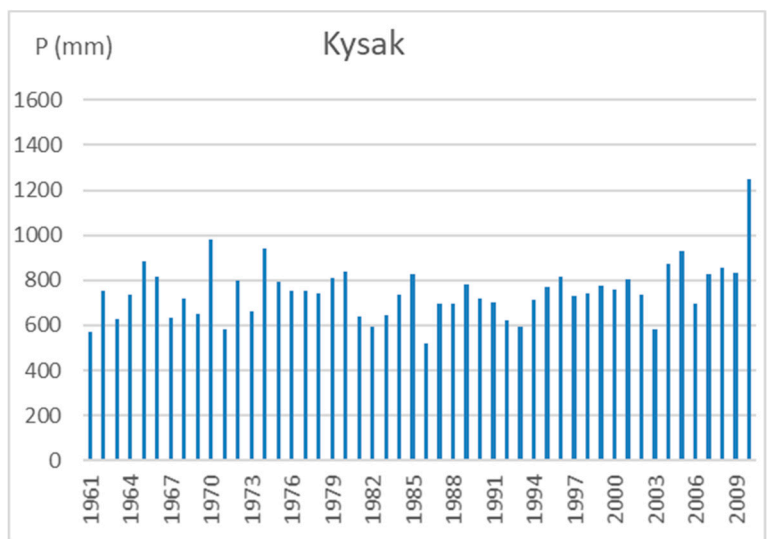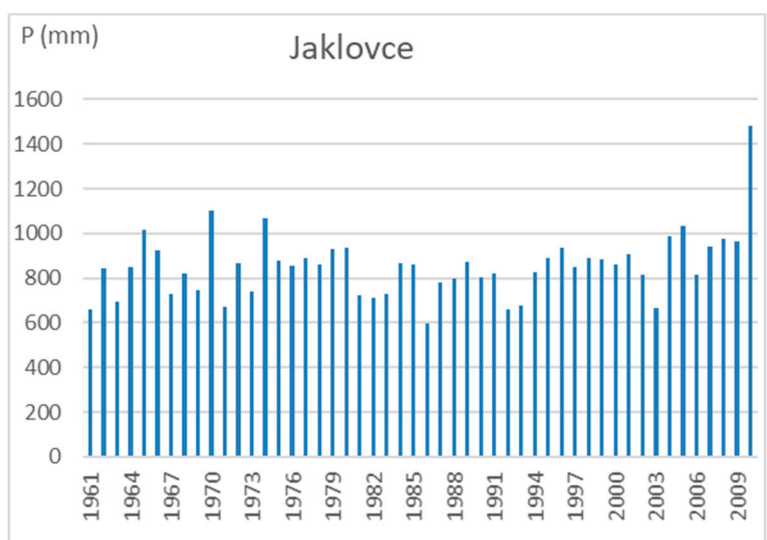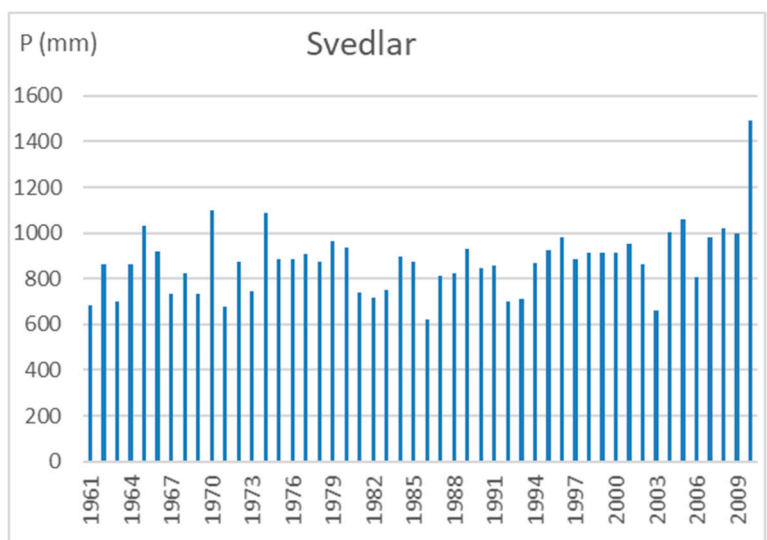

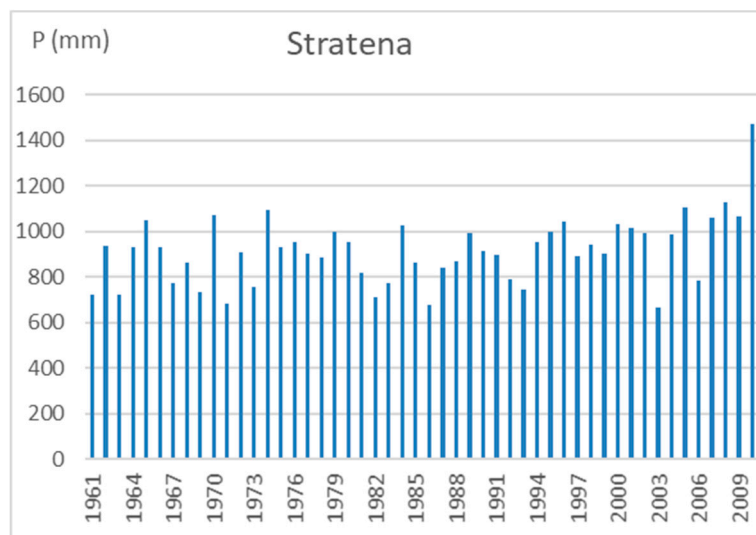

**Figure S1.** Annual precipitation totals (P) in particular years in the multiannual period 1961–2010

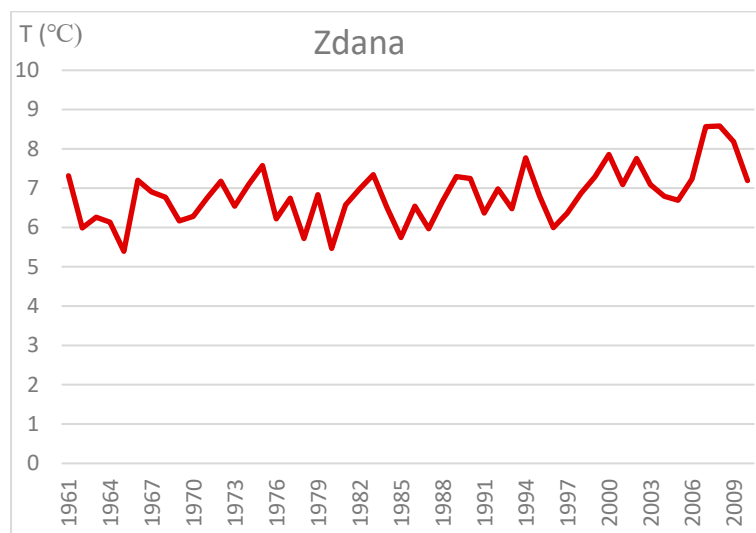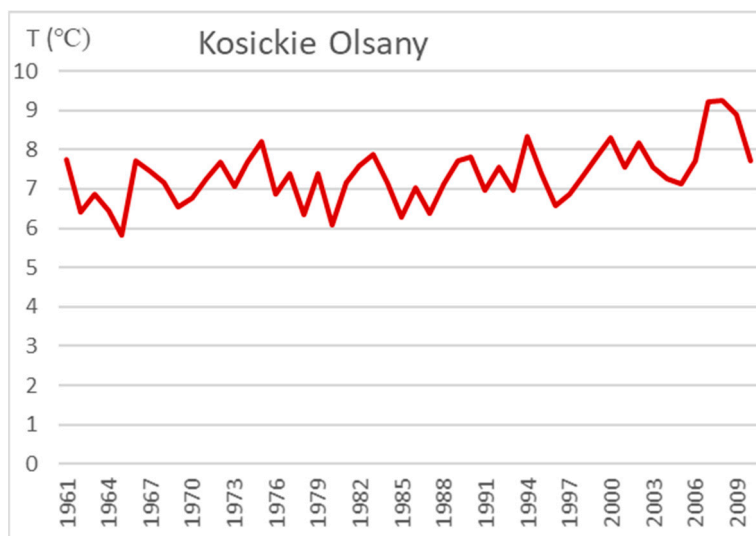

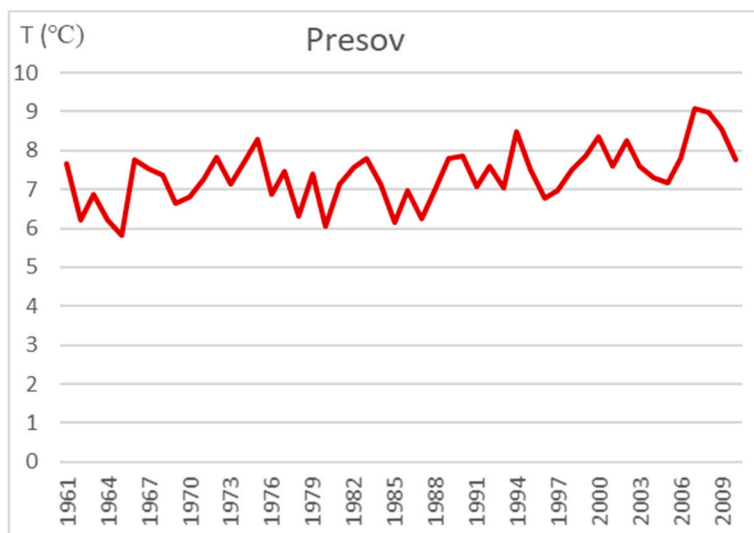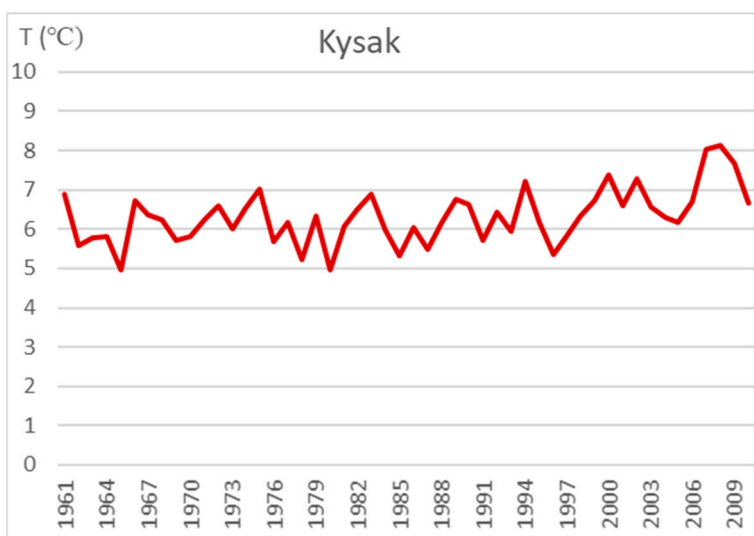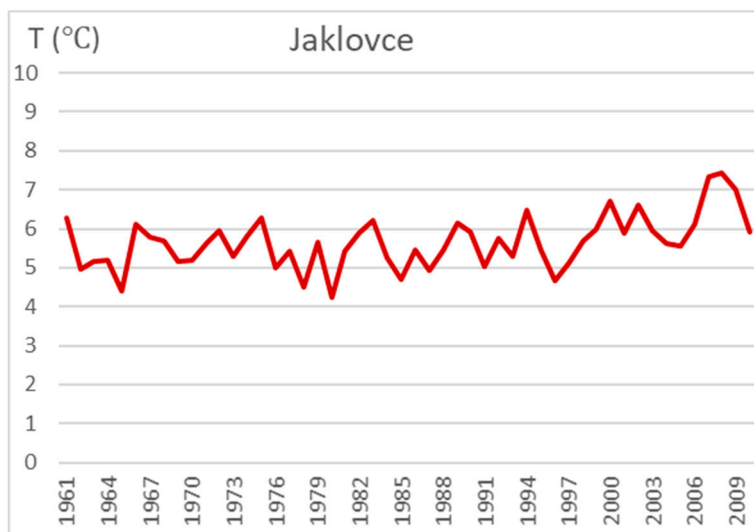

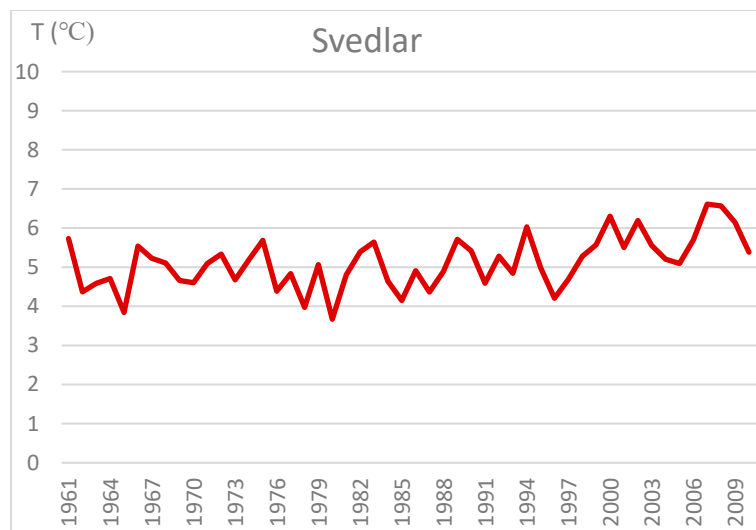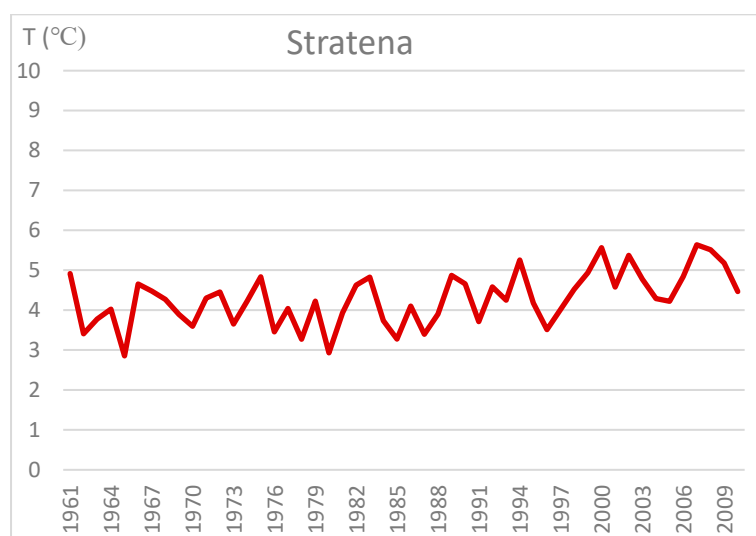

**Figure S2.** Average annual air temperature (T) in particular years in the multiannual period 1961–2010

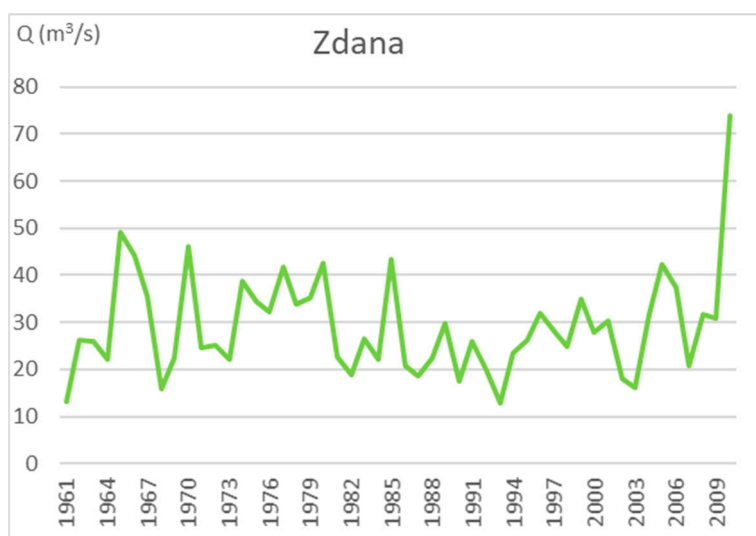

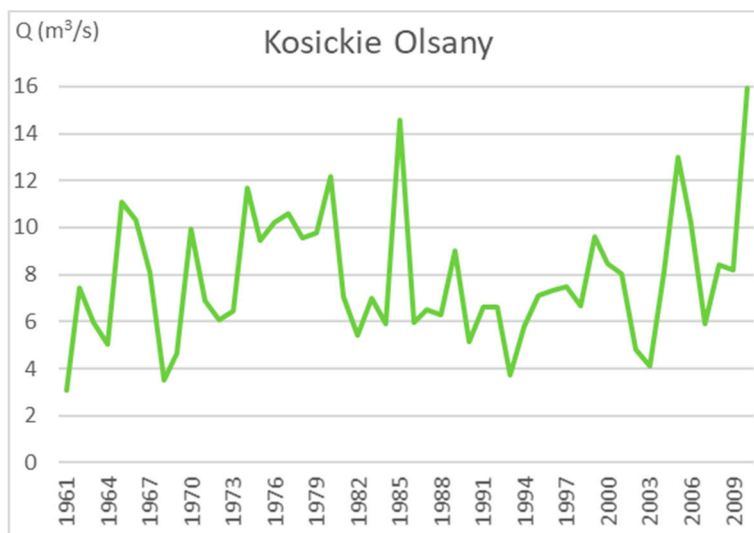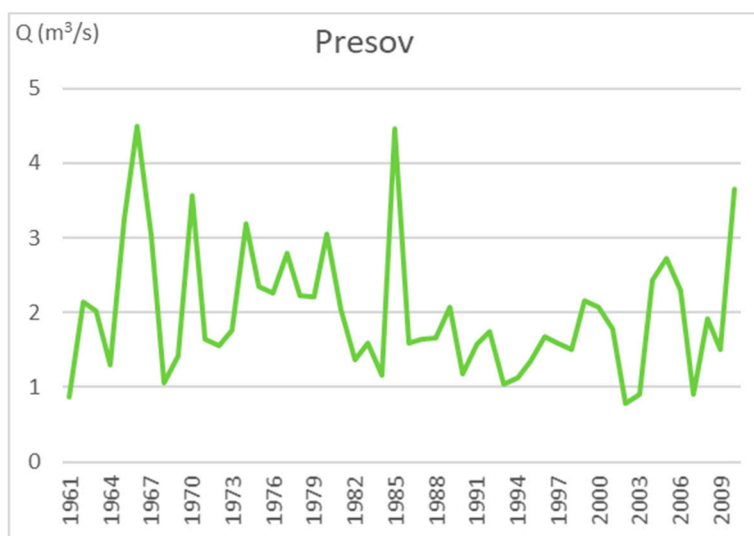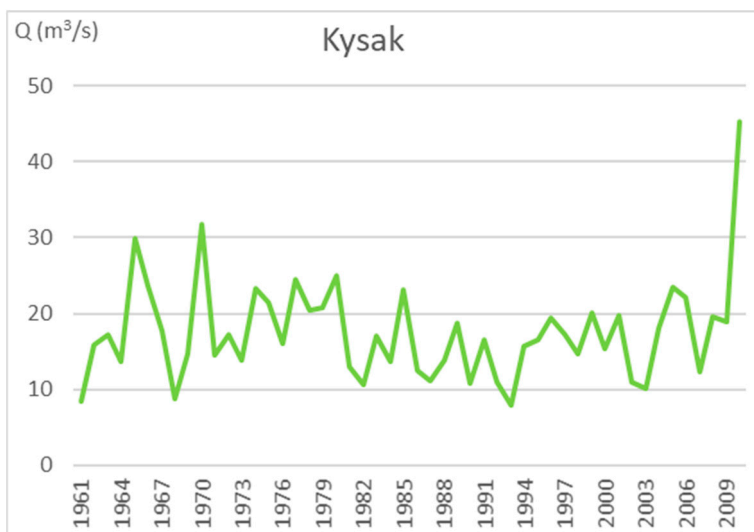

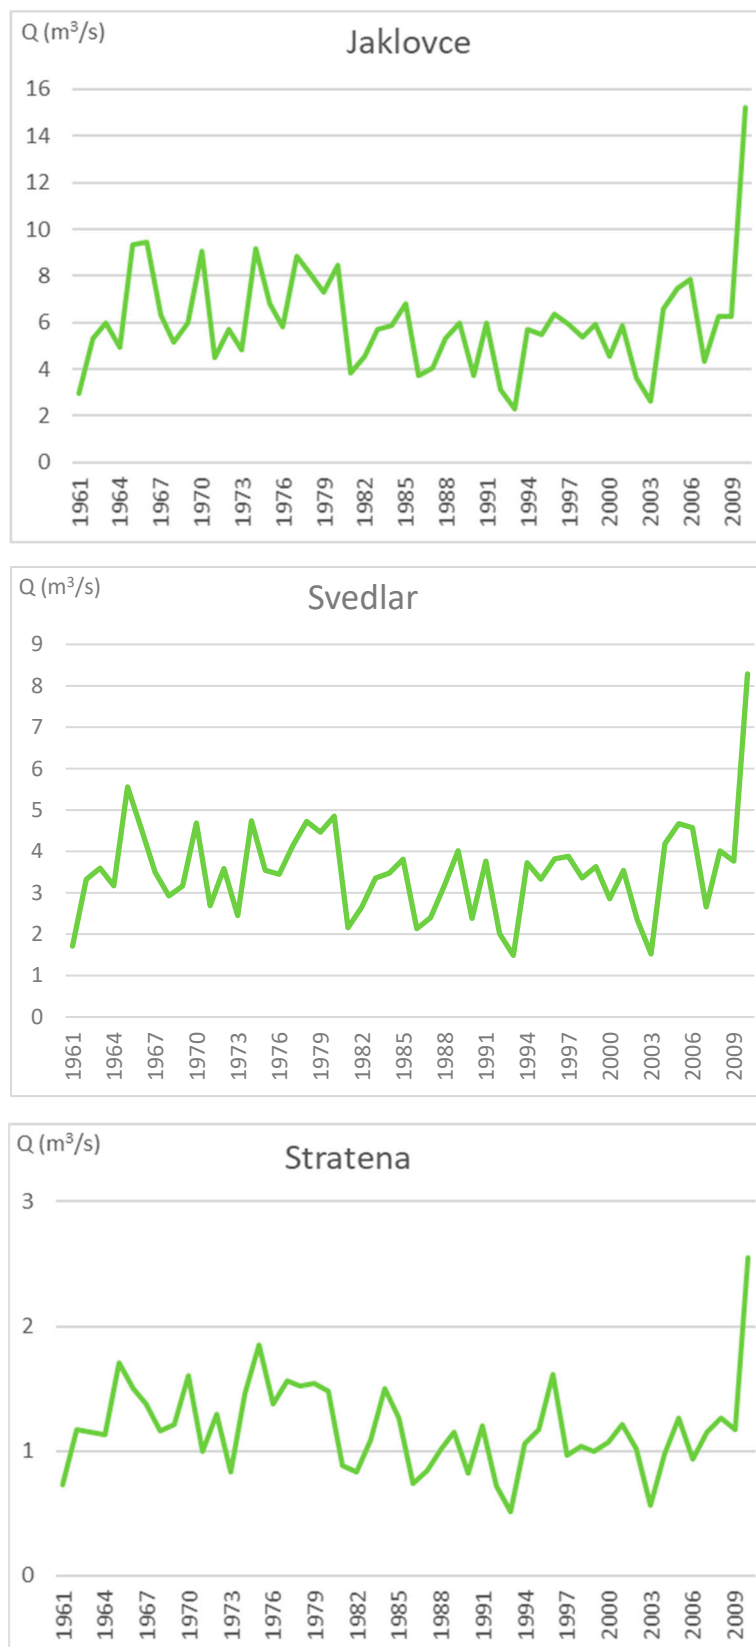

**Figure S3.** Annual flows (Q) in particular years in the multiannual period 1961–2010 as well as 1961–1985 and 1986–2010.

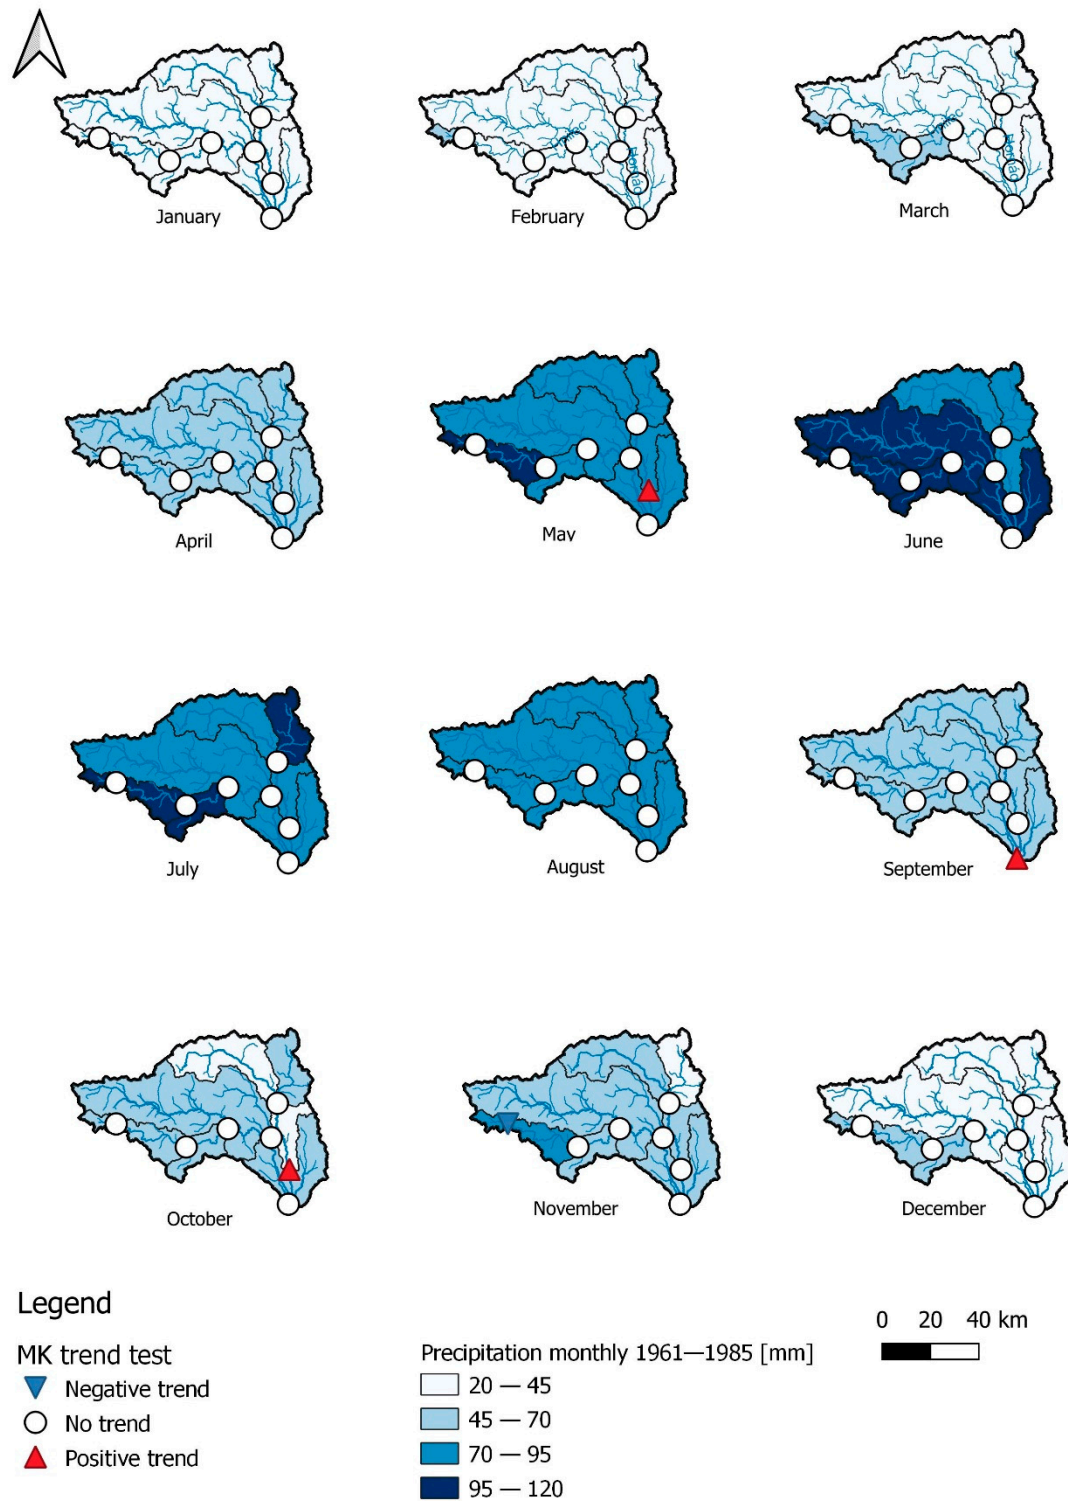

**Figure S4.** Monthly trends in the precipitation during the years 1961-1985



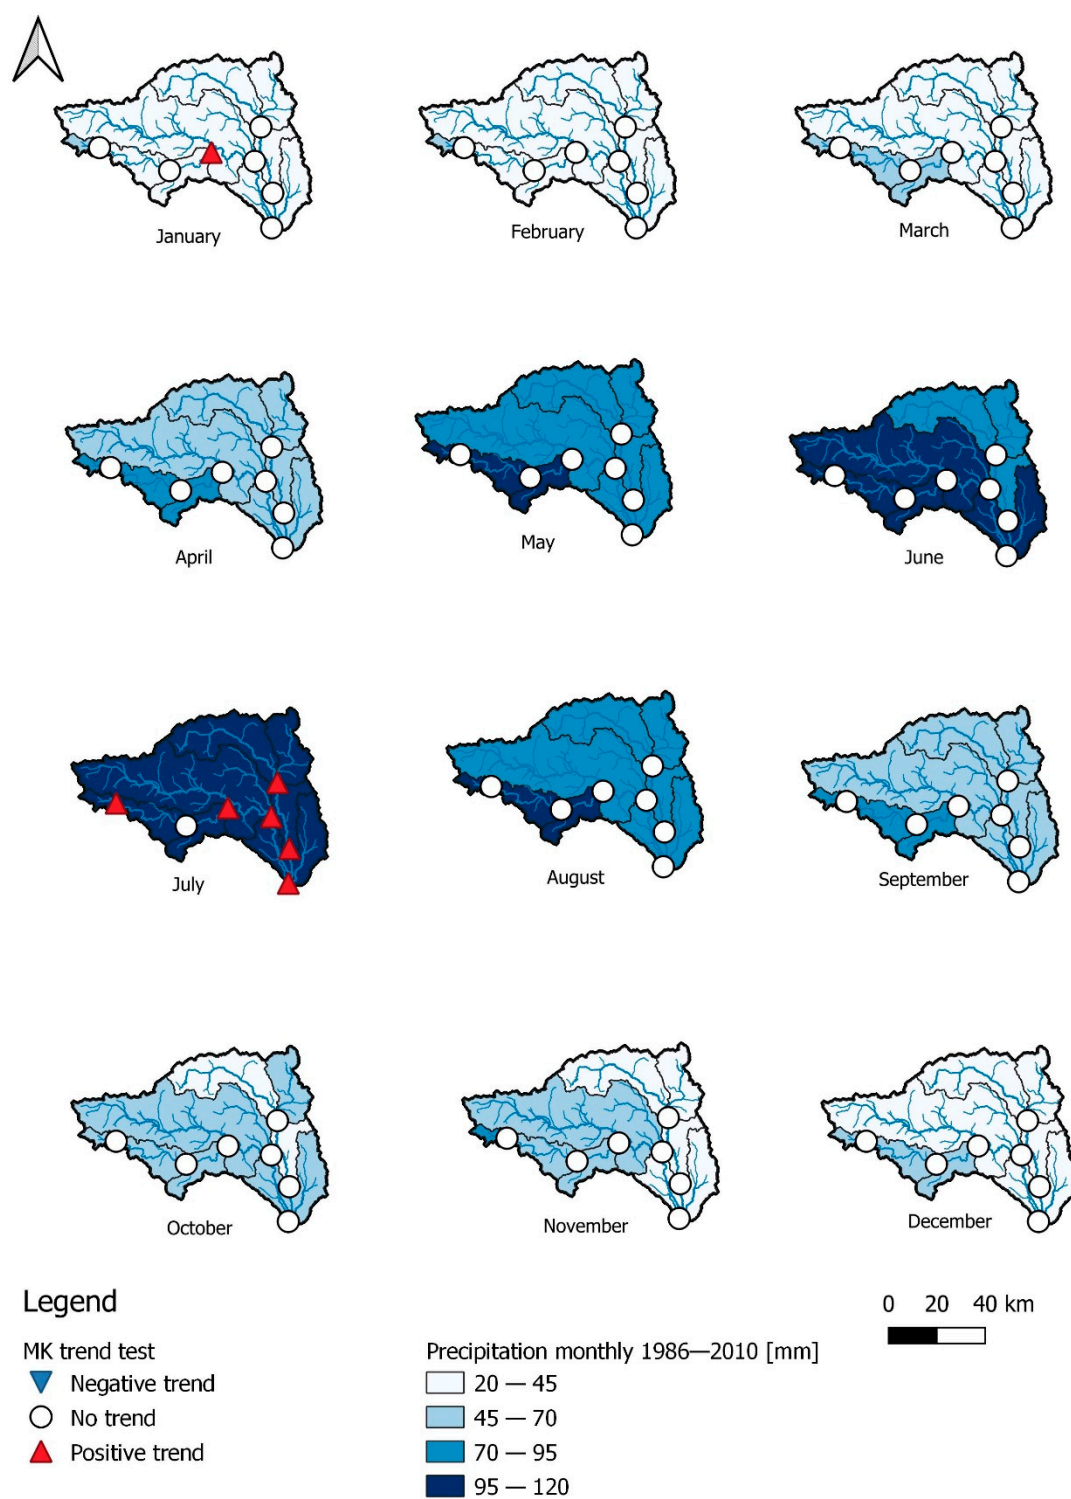

**Figure S5.** Monthly trends in the precipitation during the years 1986-2010

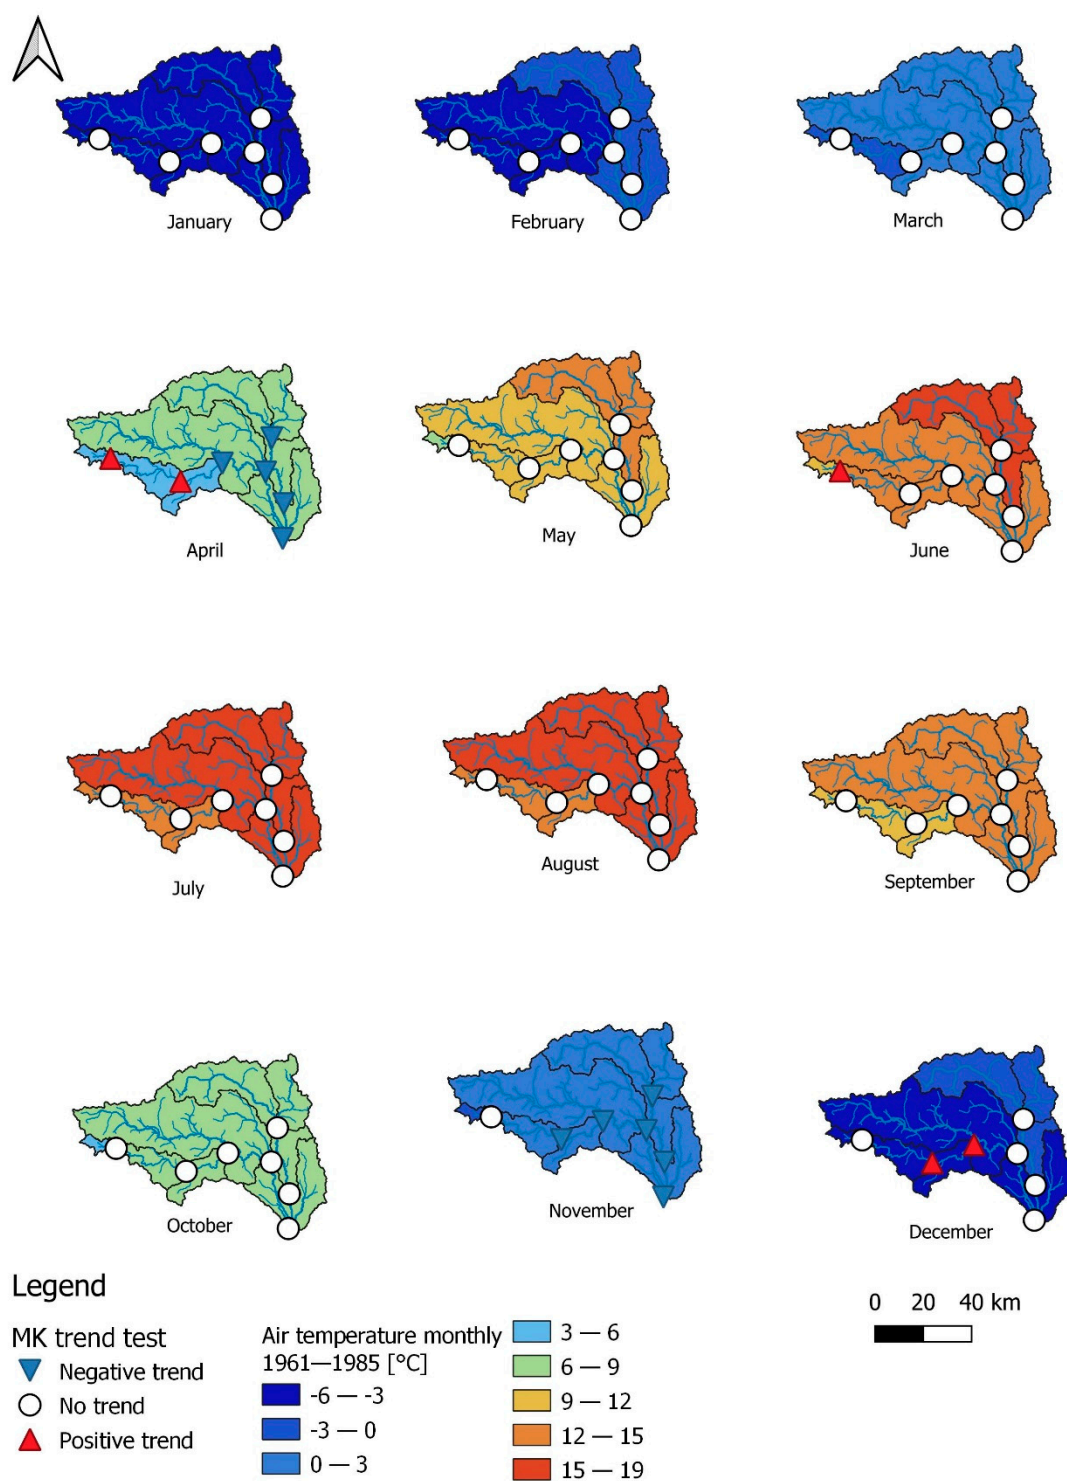

**Figure S6.** Monthly trends in the air temperature during the years 1961-1985

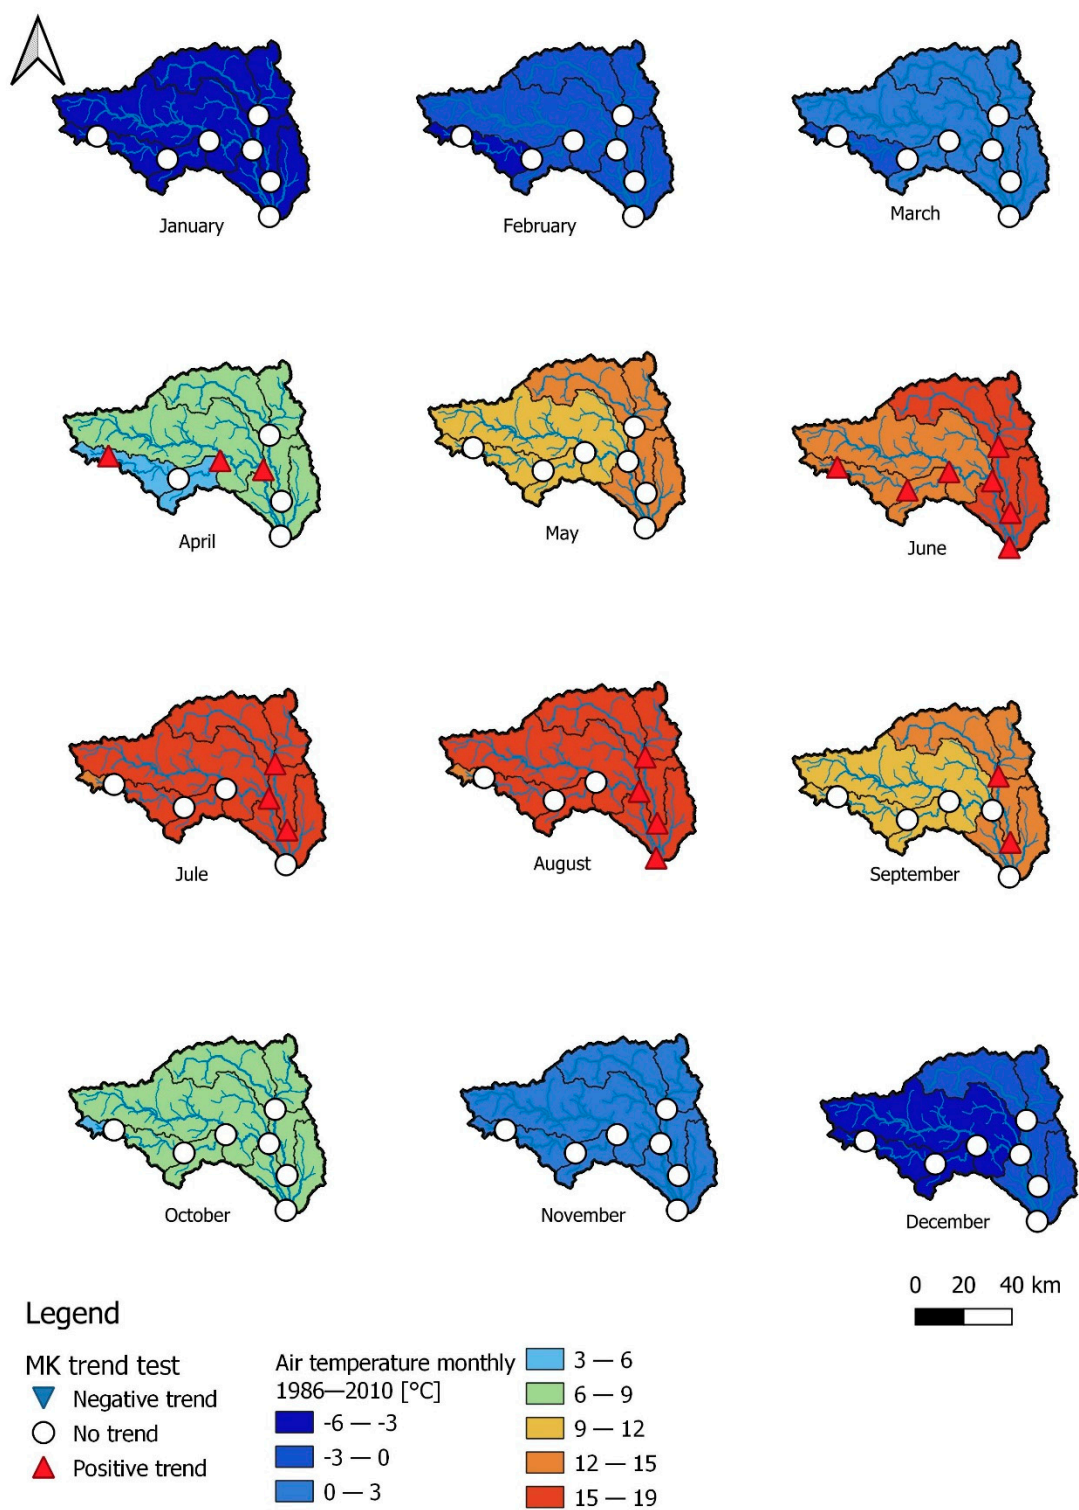

**Figure S7.** Monthly trends in the air temperature during the years 1986-2010

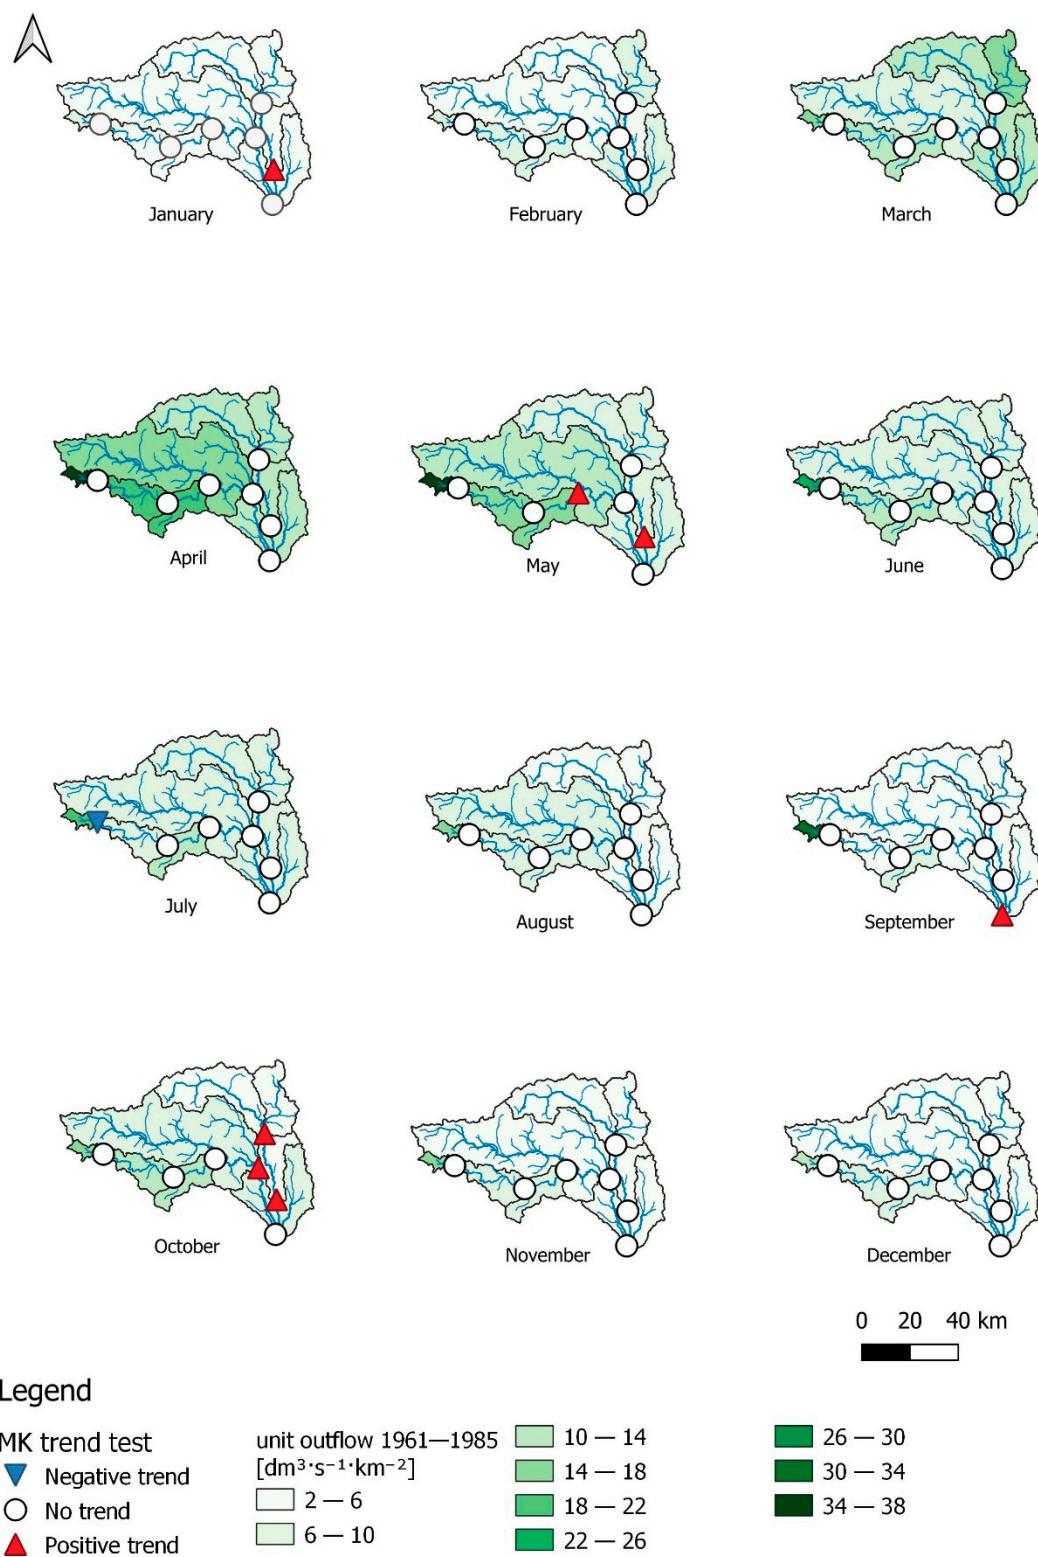

**Figure S8.** Monthly trends in flow during the years 1961-1985



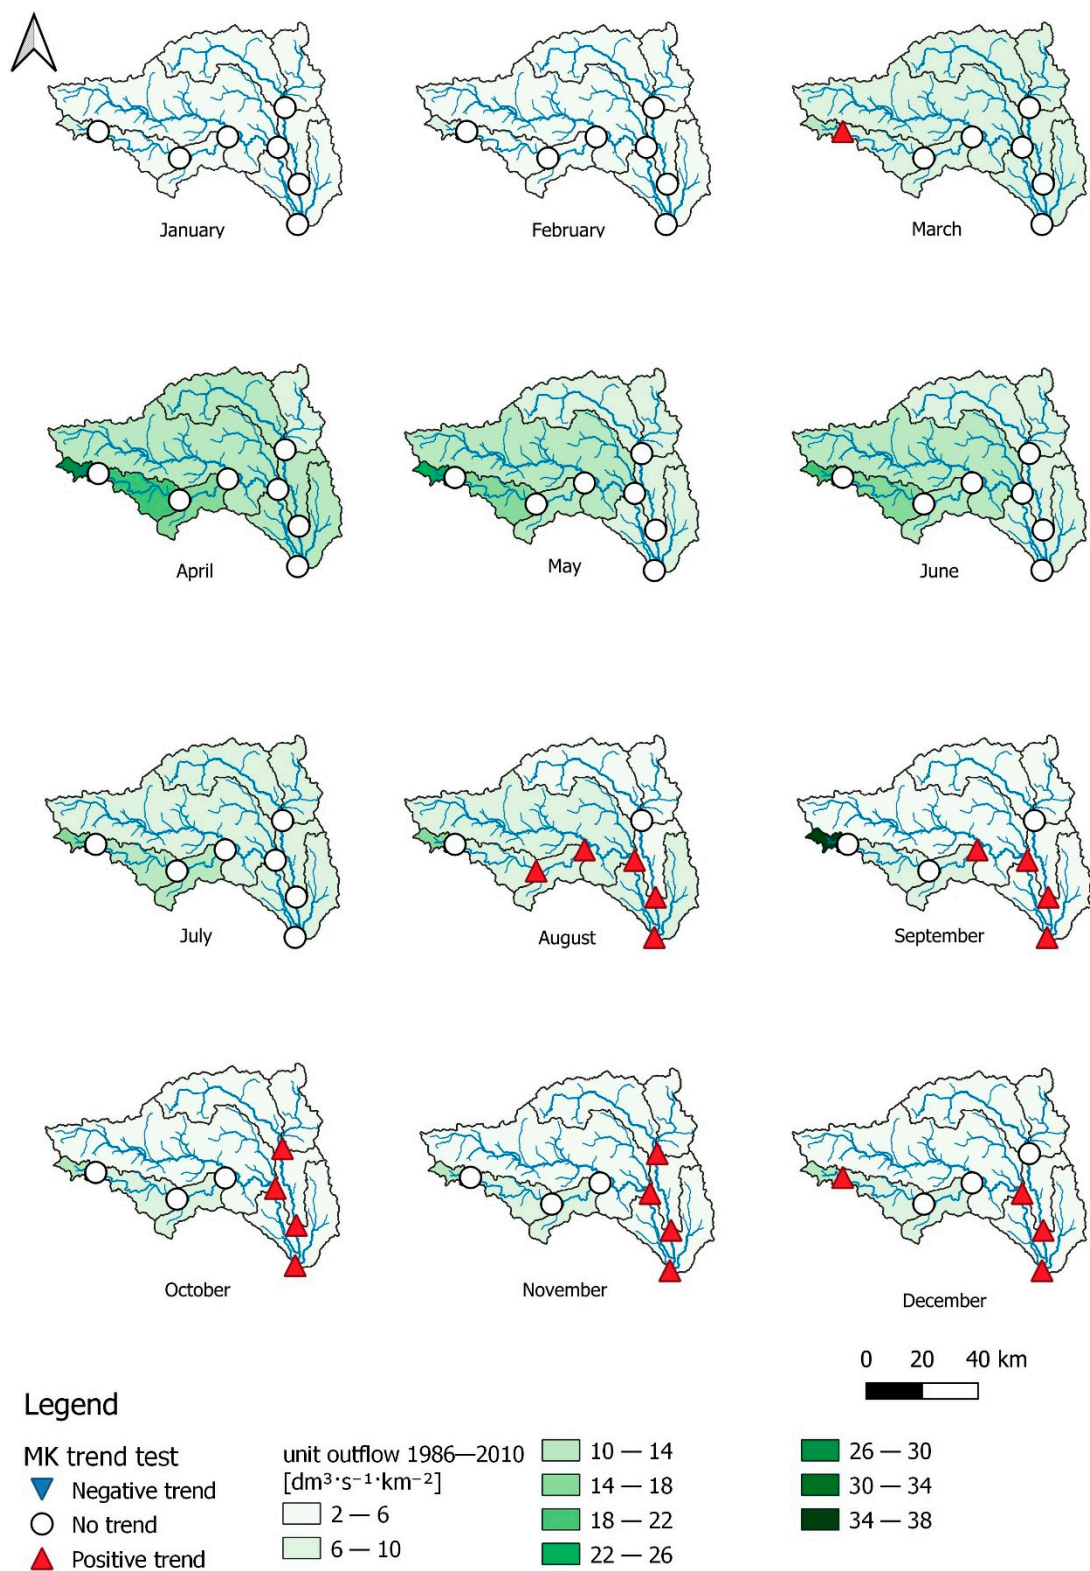

**Figure S9.** Monthly trends in flow during the years 1986-2010

**Table S1.** Results of trend analysis in precipitations

| Stations       | Parameters  | Years         |           |               |
|----------------|-------------|---------------|-----------|---------------|
|                |             | 1961–2010     | 1961–1985 | 1986–2010     |
| Zdana          | Z           | 1.8240        | 0.7240    | <b>3.3400</b> |
|                | S           | 219.0000      | 32.0000   | 144.0000      |
|                | Var S       | 14291.6700    | 1833.3333 | 1833.3333     |
|                | p-value     | 0.0682        | 0.4690    | 0.0008        |
|                | Sen's slope | 1.9930        | 2.2050    | 8.1040        |
| Kosické Olsany | Z           | 1.8240        | 1.3780    | <b>2.6860</b> |
|                | S           | 219.0000      | 60.0000   | 116.0000      |
|                | Var S       | 14290.0000    | 1833.3333 | 1833.3333     |
|                | p-value     | 0.0682        | 0.1682    | 0.0072        |
|                | Sen's slope | 1.9204        | 3.4245    | 6.5628        |
| Presov         | Z           | <b>2.0410</b> | 0.7240    | <b>2.9190</b> |
|                | S           | 245.000       | 32.000    | 126.000       |
|                | Var S       | 14291.670     | 1833.3333 | 1833.3333     |
|                | p-value     | 0.0413        | 0.4691    | 0.0035        |
|                | Sen's slope | 2.0211        | 2.1309    | 8.6840        |
| Kysak          | Z           | 1.7060        | 0.5372    | <b>3.4800</b> |
|                | S           | 205.0000      | 24.0000   | 150.0000      |
|                | Var S       | 14290.0000    | 1833.3333 | 1833.3333     |
|                | p-value     | 0.0879        | 0.5912    | 0.0005        |
|                | Sen's slope | 2.2103        | 1.3042    | 8.8045        |
| Jaklovce       | Z           | <b>2.141</b>  | 0.8170    | <b>3.6670</b> |
|                | S           | 257.0000      | 36.0000   | 158.0000      |
|                | Var S       | 14290.0000    | 1833.3333 | 1833.3333     |
|                | p-value     | 0.0322        | 0.4137    | 0.0002        |
|                | Sen's slope | 2.6718        | 1.7374    | 9.9027        |
| Svedlar        | Z           | <b>2.4260</b> | 0.8640    | <b>3.3400</b> |
|                | S           | 291.0000      | 38.0000   | 144.0000      |
|                | Var S       | 14291.6670    | 1833.3333 | 1833.3333     |
|                | p-value     | 0.0153        | 0.3875    | 0.0008        |
|                | Sen's slope | 3.2358        | 1.6311    | 9.6907        |
| Stratena       | Z           | <b>2.5930</b> | 0.2100    | <b>3.2000</b> |
|                | S           | 3110.0000     | 10.0000   | 138.0000      |
|                | Var S       | 14290.0000    | 1833.0000 | 1833.3333     |
|                | p-value     | 0.0095        | 0.8335    | 0.0014        |
|                | Sen's slope | 3.8809        | 1.5205    | 12.0445       |

\* Calculations in bold are statistically significant at the significance level of 0.05

**Table S2.** Results of trend analysis in air temperature

| Stations       | Parameters  | Years         |           |               |
|----------------|-------------|---------------|-----------|---------------|
|                |             | 1961–2010     | 1961–1985 | 1986–2010     |
| Zdana          | Z           | <b>3.1619</b> | 0.1168    | <b>2.5924</b> |
|                | S           | 379.0000      | 6.0000    | 112.0000      |
|                | Var S       | 14291.6700    | 1833.3333 | 1833.3333     |
|                | p-value     | 0.0016        | 0.9070    | 0.0095        |
|                | Sen's slope | 0.0230        | 0.0032    | 0.0521        |
| Kosicke Olsany | Z           | <b>2.9612</b> | 0.3503    | <b>2.4526</b> |
|                | S           | 355.0000      | 16.0000   | 106.0000      |
|                | Var S       | 14291.6700    | 1833.3333 | 1833.3333     |
|                | p-value     | 0.0031        | 16.0000   | 0.0142        |
|                | Sen's slope | 0.0230        | 0.0110    | 0.0525        |
| Presov         | Z           | <b>3.2958</b> | 0.3970    | <b>2.6858</b> |
|                | S           | 395.0000      | 18.0000   | 116.0000      |
|                | Var S       | 14291.6666    | 1833.3333 | 1833.3333     |
|                | p-value     | 0.0010        | 0.6913    | 0.0072        |
|                | Sen's slope | 0.0239        | 0.0058    | 0.0473        |
| Kysak          | Z           | <b>2.9277</b> | -0.0701   | <b>2.7325</b> |
|                | S           | 351.0000      | -4.0000   | 118.0000      |
|                | Var S       | 14291.6700    | 1833.3333 | 1833.3333     |
|                | p-value     | 0.0034        | 0.9441    | 0.0063        |
|                | Sen's slope | 0.0204        | -0.0010   | 0.0549        |
| Jaklovce       | Z           | <b>2.8775</b> | -0.1168   | <b>2.7325</b> |
|                | S           | 345.0000      | -6.0000   | 118.0000      |
|                | Var S       | 14291.6700    | 1833.3333 | 1833.3333     |
|                | p-value     | 0.0040        | 0.9070    | 0.0063        |
|                | Sen's slope | 0.0197        | -0.0036   | 0.0560        |
| Svedlar        | Z           | <b>3.2288</b> | -0.3503   | <b>2.5924</b> |
|                | S           | 387.0000      | -16.0000  | 112.0000      |
|                | Var S       | 14291.6700    | 1833.3333 | 1833.3333     |
|                | p-value     | 0.0012        | 0.7261    | 0.0095        |
|                | Sen's slope | 0.0216        | -0.0044   | 0.0498        |
| Stratena       | Z           | <b>3.1619</b> | -0.5372   | <b>2.4056</b> |
|                | S           | 379.0000      | -24.0000  | 104.0000      |
|                | Var S       | 14291.6700    | 1833.3333 | 1833.3333     |
|                | p-value     | 0.0016        | 0.5912    | 0.0162        |
|                | Sen's slope | 0.0218        | -0.0097   | 0.0467        |

\* Calculations in bold are statistically significant at the significance level of 0.05

**Table S3.** Results of trend analysis in flow

| Stations       | Parameters  | Years           |           |               |
|----------------|-------------|-----------------|-----------|---------------|
|                |             | 1961–2010       | 1961–1985 | 1986–2010     |
| Zdana          | Z           | 0.0836          | 0.5372    | <b>2.7325</b> |
|                | S           | 1.1000          | 24.0000   | 118.0000      |
|                | Var S       | 1.4292          | 1833.3333 | 1833.3333     |
|                | p-value     | 0.9333          | 0.5912    | 0.0063        |
|                | Sen's slope | 0.0058          | 0.1649    | 0.6206        |
| Kosicke Olsany | Z           | 0.8198          | 1.5181    | <b>2.5457</b> |
|                | S           | 99.0000         | 66.0000   | 110.0000      |
|                | Var S       | 4291670000.0000 | 1833.333  | 1833.3333     |
|                | p-value     | 0.4124          | 0.1290    | 0.0109        |
|                | Sen's slope | 0.0244          | 0.1388232 | 0.1340        |
| Presov         | Z           | -1.0874         | 0.3036    | 1.1444        |
|                | S           | -131.0000       | 14.0000   | 50.0000       |
|                | Var S       | 14291.6667      | 1833.3333 | 1833.3333     |
|                | p-value     | 0.2768          | 0.7614    | 0.2525        |
|                | Sen's slope | -0.0099         | 0.0065    | 0.0211        |
| Kysak          | Z           | 0.1004          | 0.4905    | <b>2.4523</b> |
|                | S           | 13.0000         | 2.20000   | 106.0000      |
|                | Var S       | 14291.6700      | 1833.3333 | 1833.3333     |
|                | p-value     | 0.9200          | 0.6238    | 0.0142        |
|                | Sen's slope | 0.0081          | 0.1140    | 0.3565        |
| Jaklovce       | Z           | -0.5354         | 0.3036    | <b>2.2654</b> |
|                | S           | -65.0000        | 14.0000   | 98.0000       |
|                | Var S       | 14291.6700      | 1833.3333 | 1833.3333     |
|                | p-value     | 0.5924          | 0.7614    | 0.0235        |
|                | Sen's slope | -0.0106         | 0.0213    | 0.1015        |
| Svedlar        | Z           | 0.2008          | 0.4437    | <b>2.1253</b> |
|                | S           | 25.0000         | 20.0000   | 92.0000       |
|                | Var S       | 14291.6700      | 1833.3333 | 1833.3333     |
|                | p-value     | 0.8409          | 0.6572    | 0.0336        |
|                | Sen's slope | 0.0030          | 0.0158    | 0.0642        |
| Stratena       | Z           | <b>-2.0243</b>  | 0.0000    | <b>2.1720</b> |
|                | S           | 243.0000        | 0.0000    | 94.0000       |
|                | Var S       | 14291.6667      | 1833.3333 | 1833.3333     |
|                | p-value     | 0.0429          | 1.0000    | 0.0299        |
|                | Sen's slope | -0.0063         | -0.0005   | 0.0123        |

\* Calculations in bold are statistically significant at the significance level of 0.05
